# Supplementary material
Source: publisher figshare collection journal article supplement (https://acs.figshare.com/ndownloader/files/3780754)

# S1 Supporting Information

## Tyrosyl-DNA Phosphodiesterase I Inhibitors from an Australian Plant *Macropteranthes leichhardtii*

Li-Wen Tian,<sup>†</sup> Yunjiang Feng,<sup>†</sup> Trong D. Tran,<sup>†</sup> Yoko Shimizu,<sup>‡</sup> Tom Pfeifer,<sup>‡</sup> Paul I. Forster,<sup>§</sup> and  
Ronald J. Quinn<sup>†,\*</sup>

<sup>†</sup>Eskitis Institute for Drug Discovery, Griffith University, Brisbane, QLD, 4111, Australia;

<sup>‡</sup>Centre for Drug Research and Development, Vancouver, BC, 2405, Canada;

<sup>§</sup>Queensland Herbarium, Toowong, QLD, 4066, Australia

\*E-mail: r.quinn@griffith.edu.au Tel. +61-7-3735-6006. Fax: +61-7-3735-6001.

### Contents:

**S2** <sup>1</sup>H NMR spectrum for macropteranthol (**1**) in DMSO-*d*<sub>6</sub>

**S3** gCOSY spectrum for macropteranthol (**1**) in DMSO-*d*<sub>6</sub>

**S4** gHSQC spectrum for macropteranthol (**1**) in DMSO-*d*<sub>6</sub>

**S5** gHMBC spectrum for macropteranthol (**1**) in DMSO-*d*<sub>6</sub>

**S6** Calculated Boltzmann distributions and optical rotations for each conformer of **1**

**S7** Acid hydrolysis for compound **5**

**S2**  $^1\text{H}$  NMR spectrum for macropteranthol (**1**) in  $\text{DMSO-}d_6$

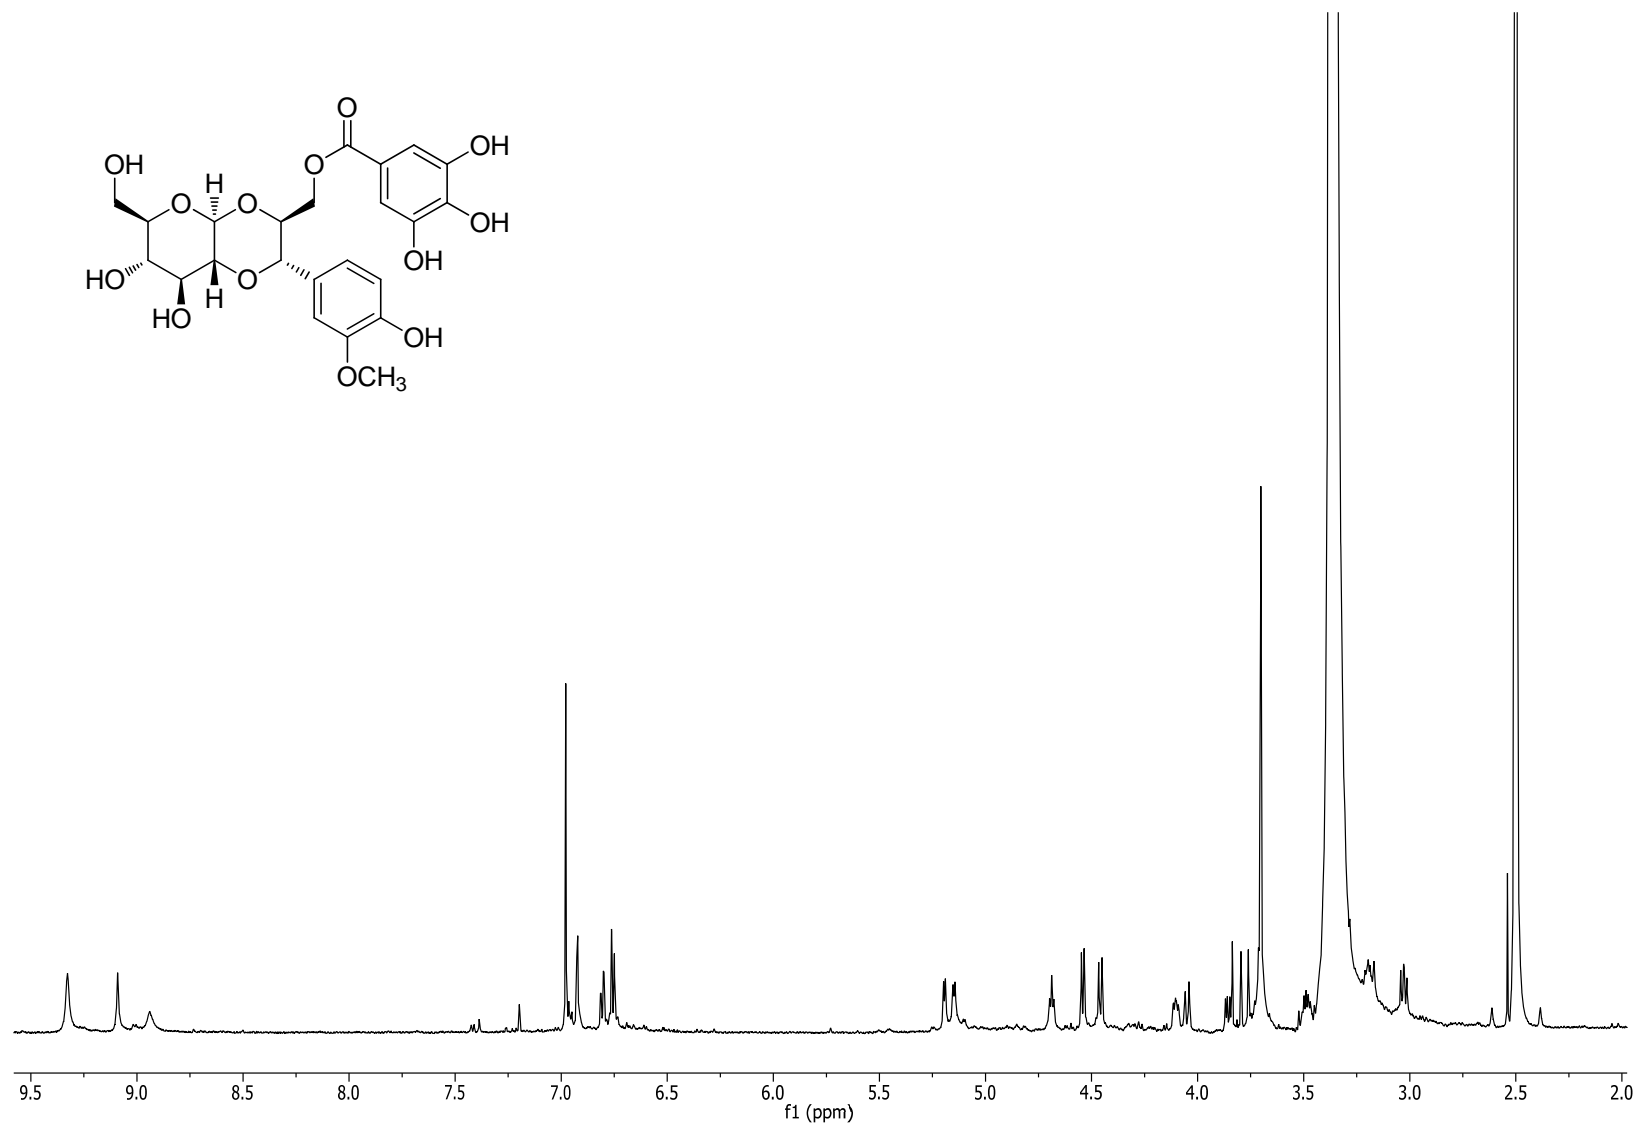

**S3** gCOSY spectrum for macropteranthol (**1**) in DMSO- $d_6$

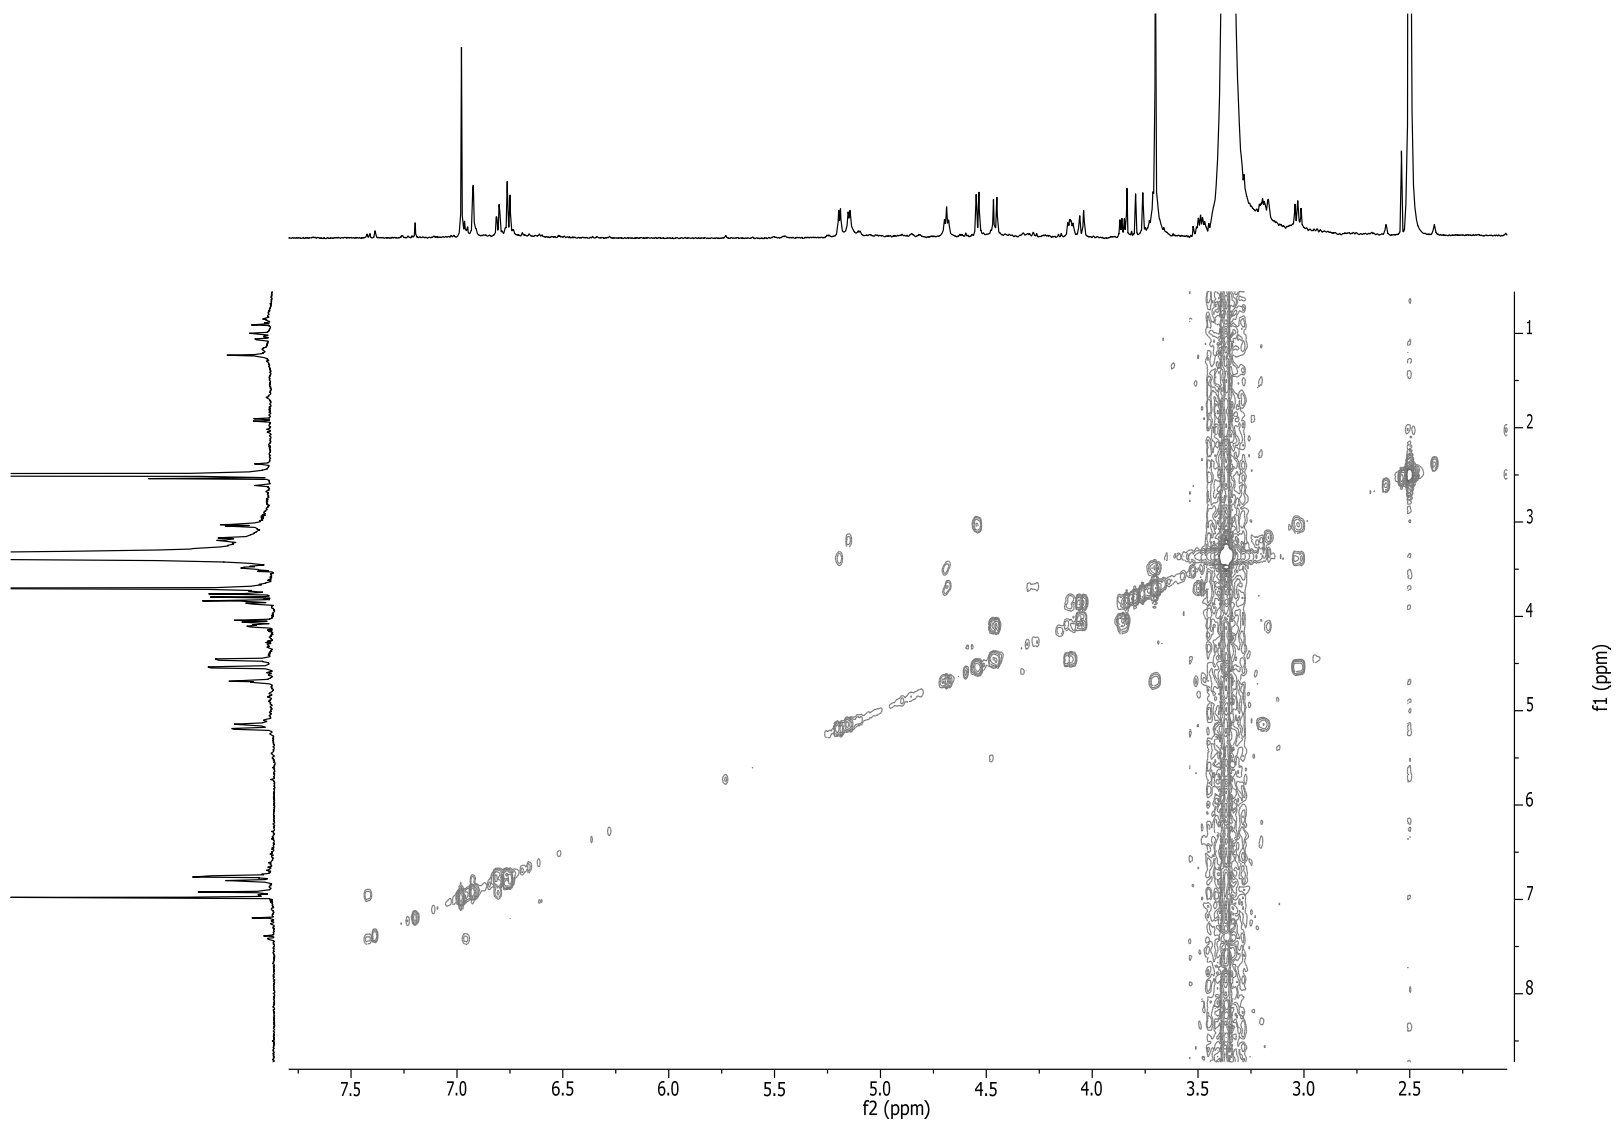

**S4** gHSQC spectrum for macropteranthol (**1**) in DMSO- $d_6$

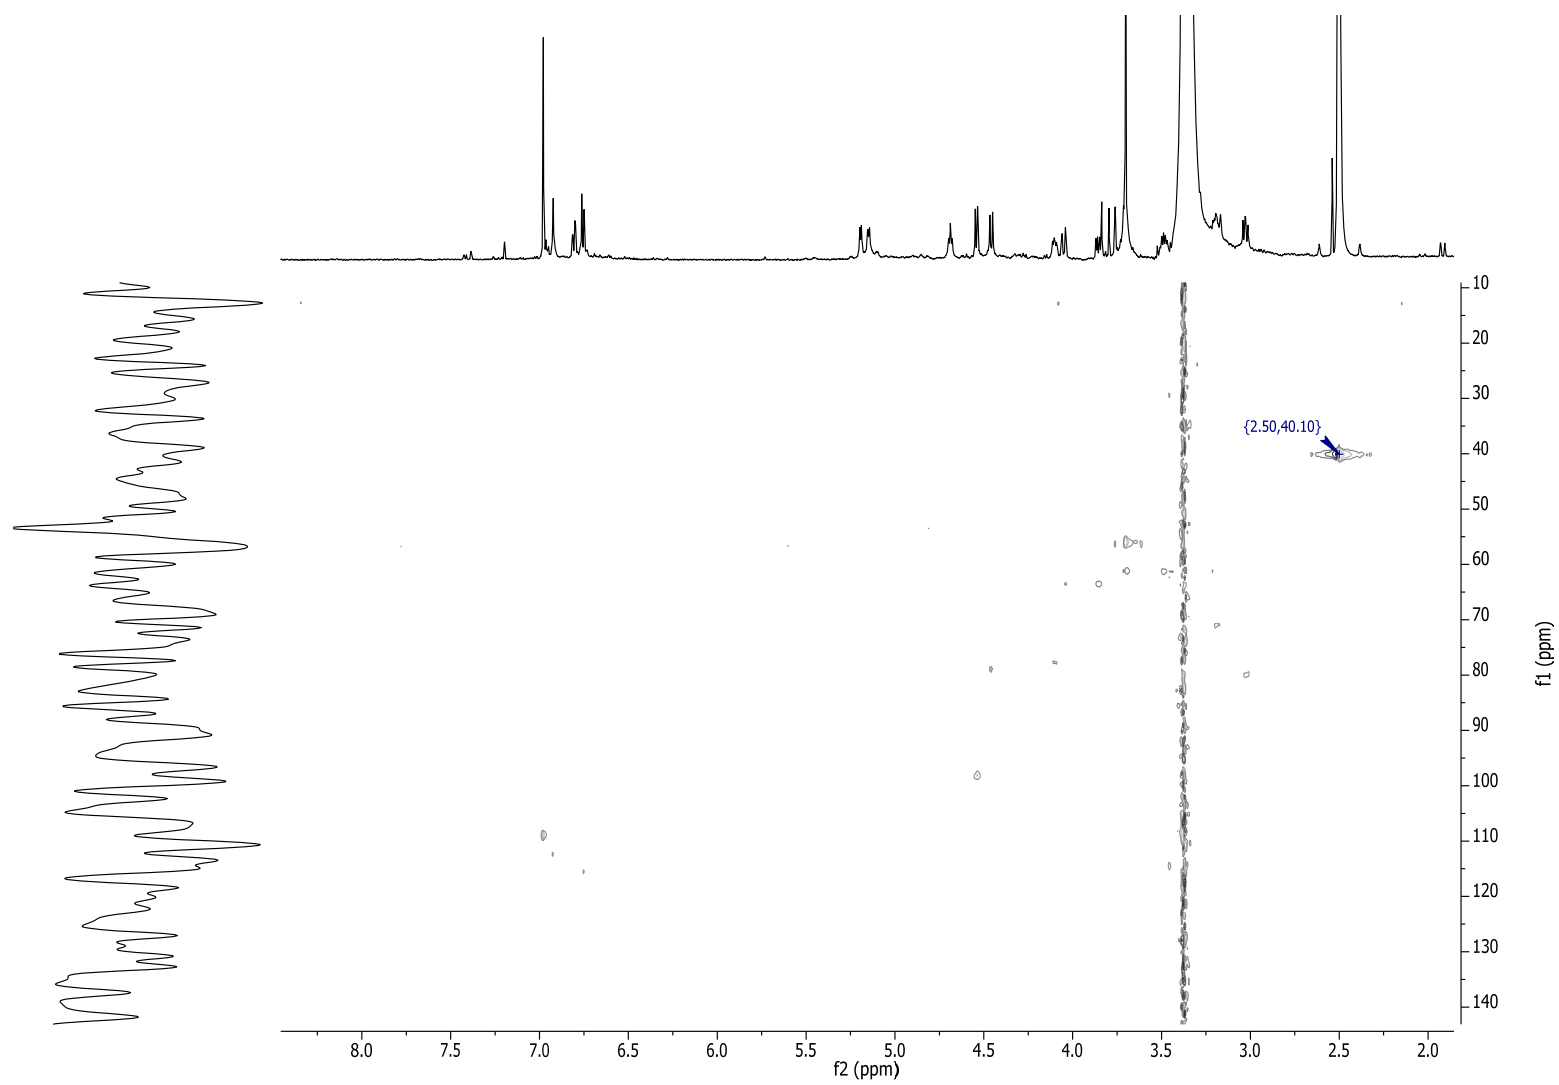

**S5** gHMBC spectrum for macropteranthol (**1**) in DMSO- $d_6$

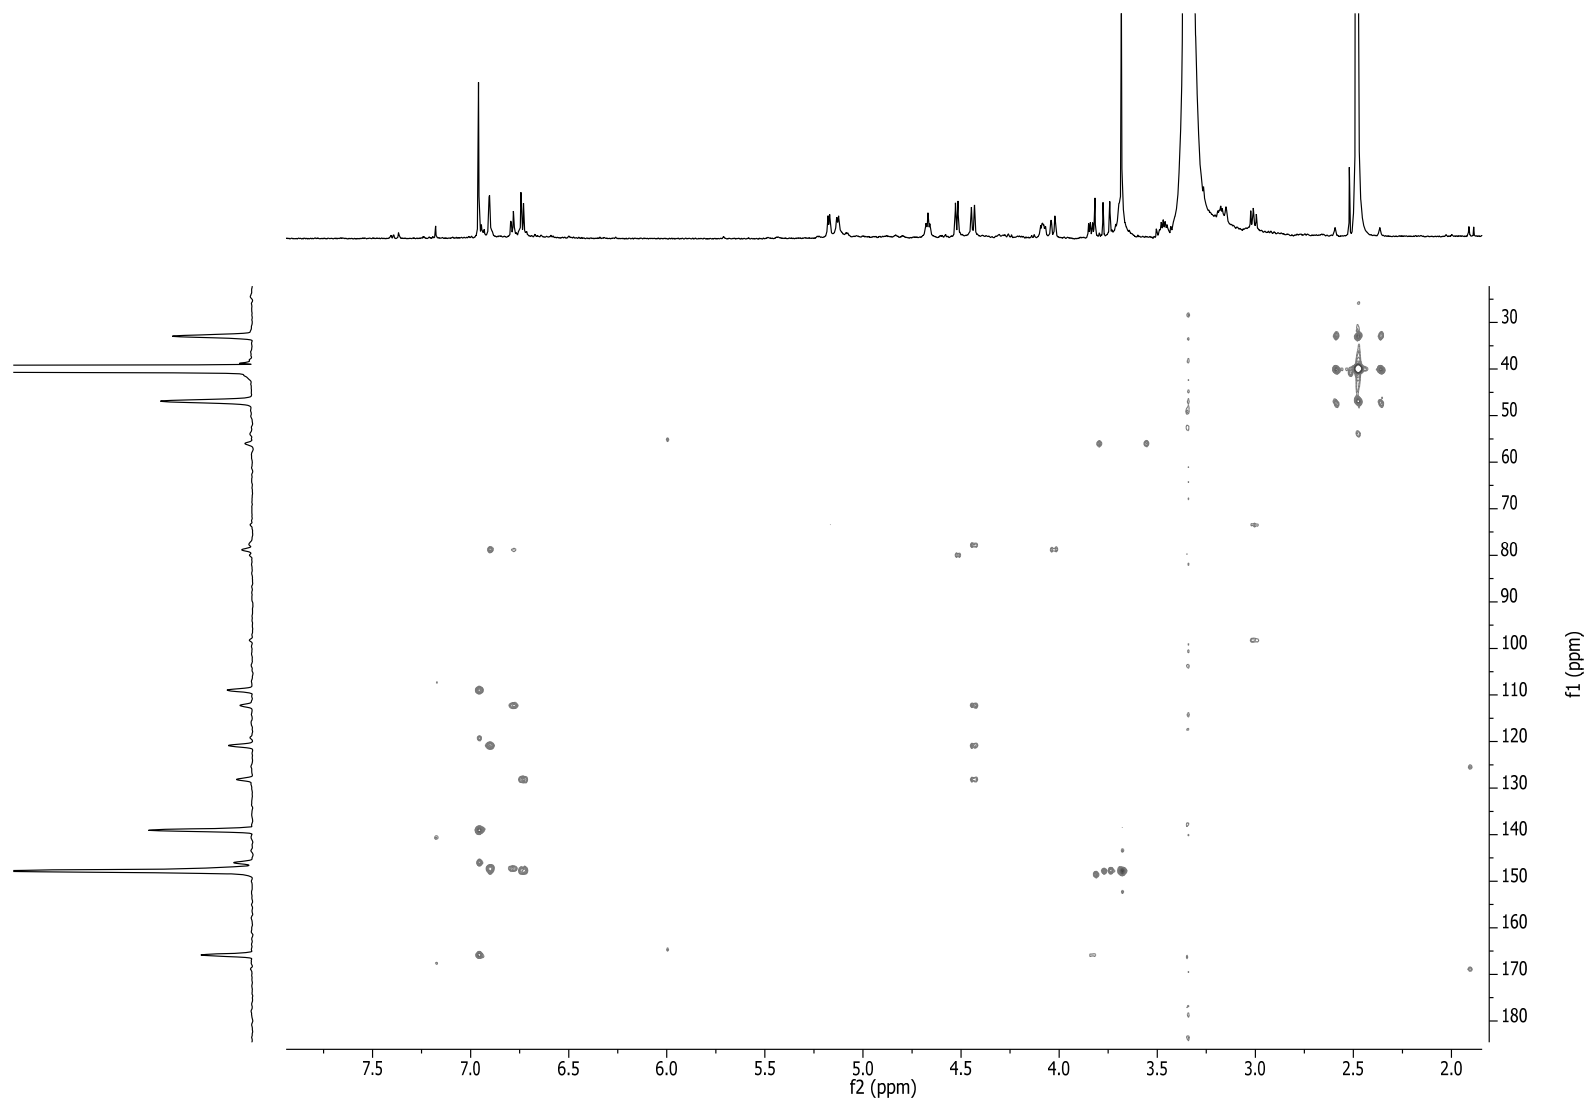

## S6 Calculated Boltzmann distributions and optical rotations for each conformer of **1**

| Conformer                    | HF                            |                     | DFT                           |                     |
|------------------------------|-------------------------------|---------------------|-------------------------------|---------------------|
|                              | Boltzmann<br>distribution (%) | Optical<br>rotation | Boltzmann<br>distribution (%) | Optical<br>rotation |
| 1                            | 16.23                         | 27.38               | 2.70                          | 13.6                |
| 2                            | 16.23                         | 27.38               | 2.70                          | 13.68               |
| 3                            | 0.36                          | 49.71               | 0.16                          | 61.11               |
| 4                            | 0.76                          | -6.82               | 79.93                         | 0.03                |
| 5                            | 4.55                          | 36.88               | 1.49                          | 98.34               |
| 6                            | 0.66                          | 7.81                | 0.25                          | -39.2               |
| 7                            | 13.84                         | 26.11               | 2.46                          | 107.21              |
| 8                            | 24.61                         | -7.92               | 3.49                          | -29.85              |
| 9                            | 1.68                          | 25.53               | 0.93                          | 262.96              |
| 10                           | 2.27                          | 79.34               | 0.96                          | 202.4               |
| 11                           | 2.11                          | 88.87               | 0.91                          | 219.66              |
| 12                           | 10.14                         | 16.23               | 1.87                          | 17.07               |
| 13                           | 5.59                          | 49.93               | 1.23                          | 101.82              |
| 14                           | 0.99                          | 123.19              | 0.93                          | 262.68              |
| Weighted optical<br>rotation |                               | 22.17               |                               | 14.21               |

## S7 Acid hydrolysis of compound (5)

In a typical hydrolysis, compound **5** (0.3 mg) was heated in 2 N HCl (1 mL) at 70 °C for 4 h. The resulting hydrolysate was analyzed by LC-MS. The LC-MS result revealed that compound **5** was not detected and the aglycone {+ESIMS  $m/z$  199 [M + H]<sup>+</sup>} and sugar part {+ESIMS  $m/z$  333 [M + H]<sup>+</sup>} were appeared. The hydrolysate was dried under vacuum and then was pre-adsorbed to cotton, following by packing into a stainless steel cartridge (10 × 30 mm) that was subsequently attached to a C<sub>18</sub> preparative HPLC column. Isocratic HPLC conditions of 90% H<sub>2</sub>O (0.1% TFA)/10% MeOH (0.1% TFA) were initially employed for the first 10 min, then a linear gradient to 100% MeOH (0.1% TFA) was run over 40 min, followed by isocratic conditions of 100% MeOH (0.1% TFA) for a further 10 min, all at a flow rate of 9.0 mL/min. Fraction 5 contained the aglycone (0.1 mg) which gave an  $[\alpha]_D$  -6.2, ( $c$  0.005, MeOH), while standard 8(*S*)-1,2-diol-3-(4-hydroxy-3-methoxy-phenyl) propane had an  $[\alpha]_D$  -23, ( $c$  0.69, EtOH) and 8(*R*)-isomer an  $[\alpha]_D$  +18, ( $c$  0.73, EtOH).

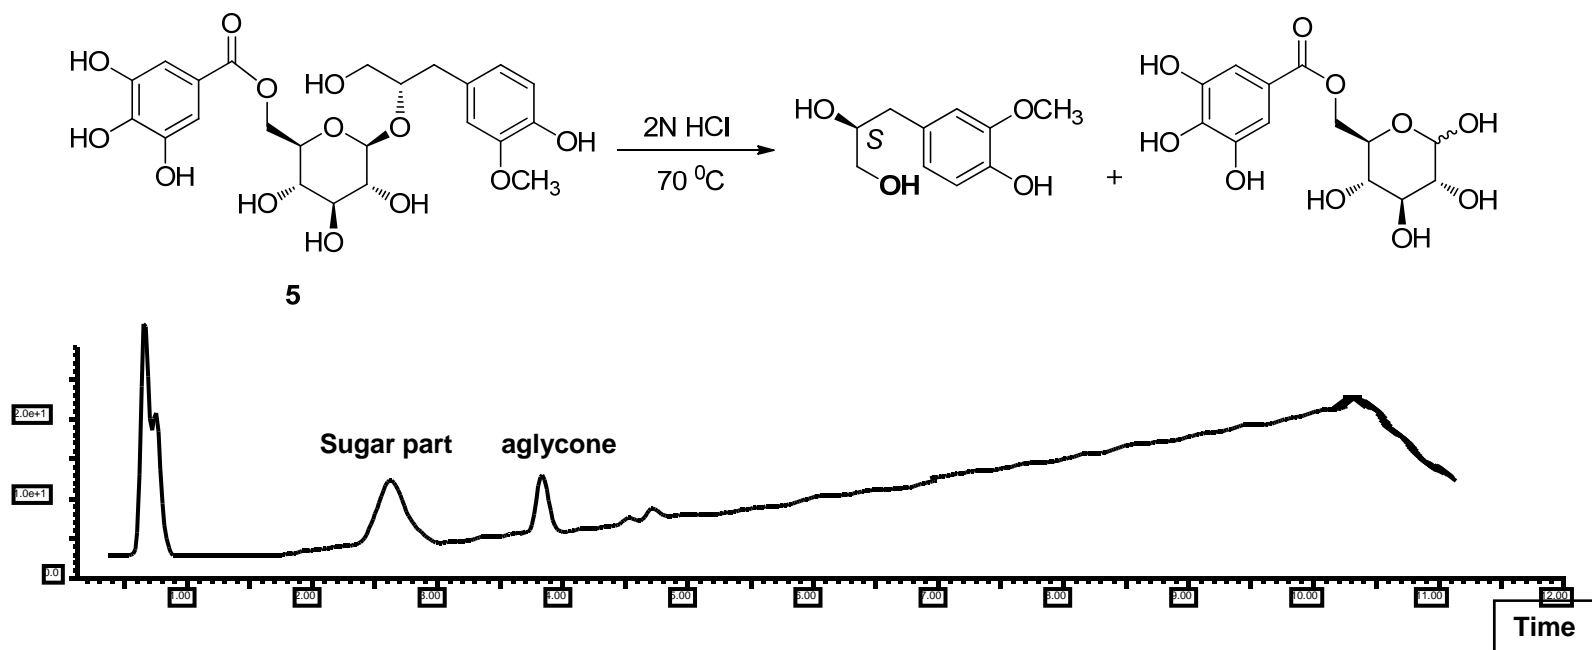

Supplement: Supplementary file 1 [file 3780754]
